# Supplementary figures and images for: Structural and magnetic properties of Co3(dpa)4Br2 †
Source: Royal Society of Chemistry journal article supplement (doi:10.1039/b007876j), 2001-01-01

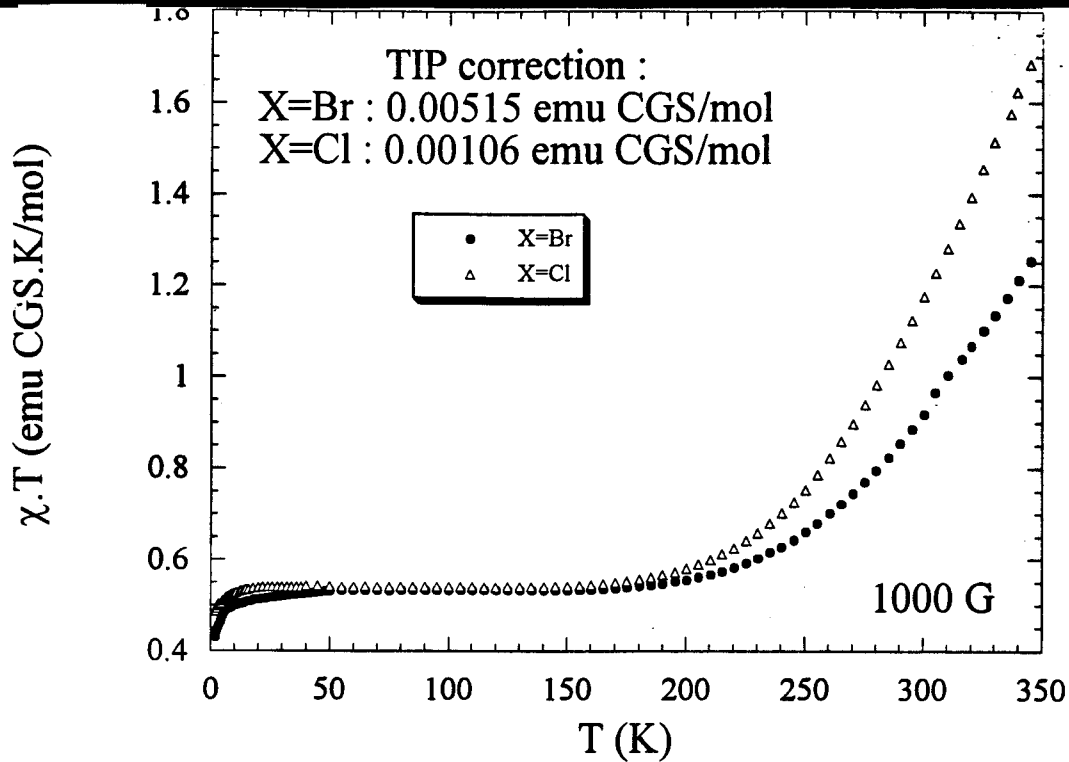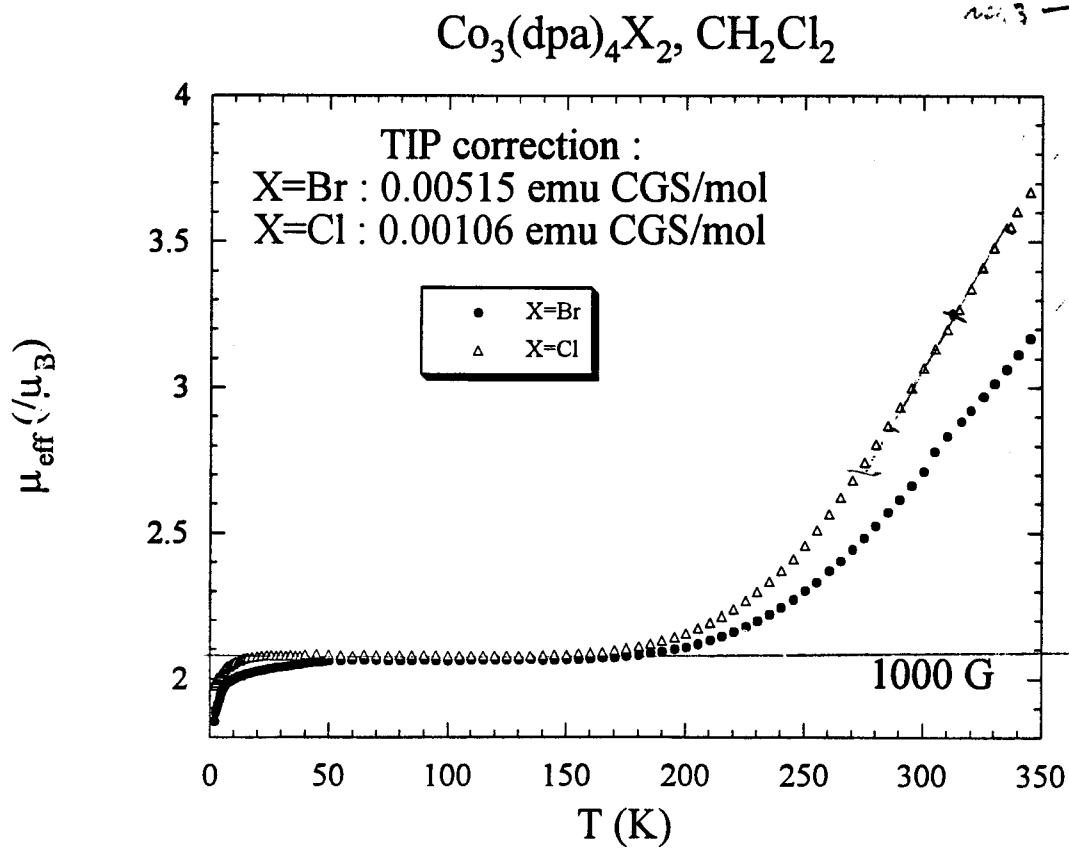

Supplement: b007876j_1.pdf [file b007876j_1.pdf]

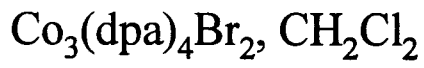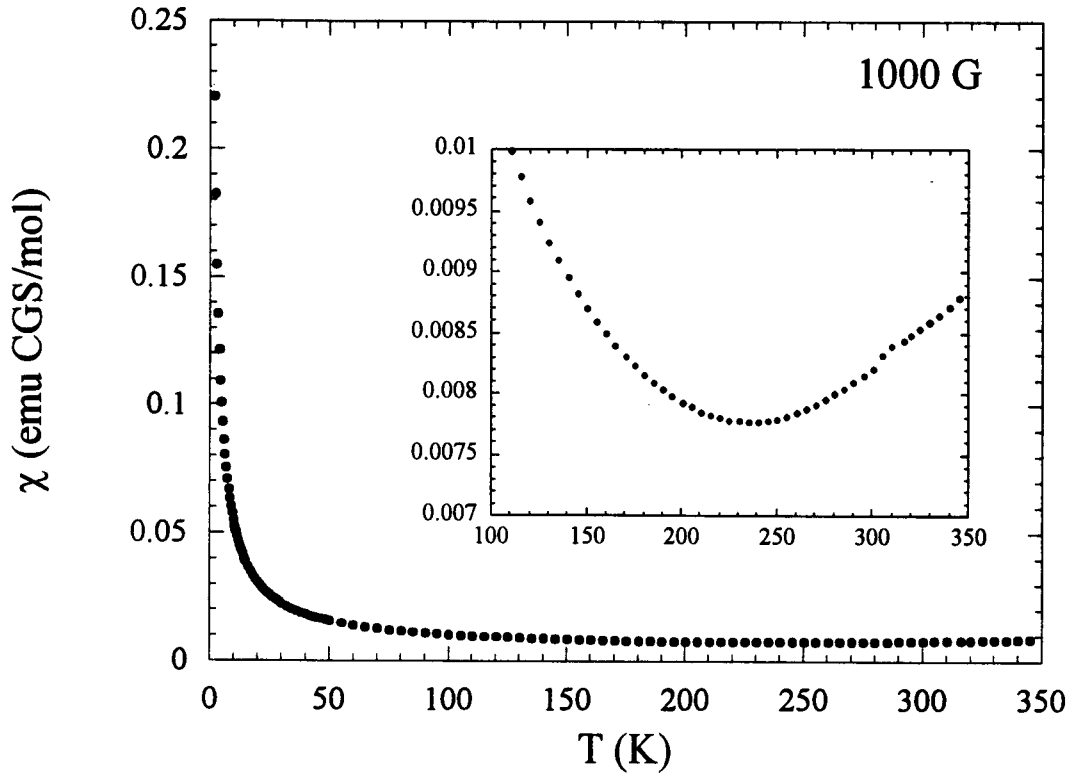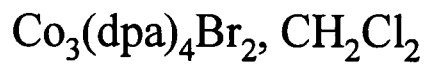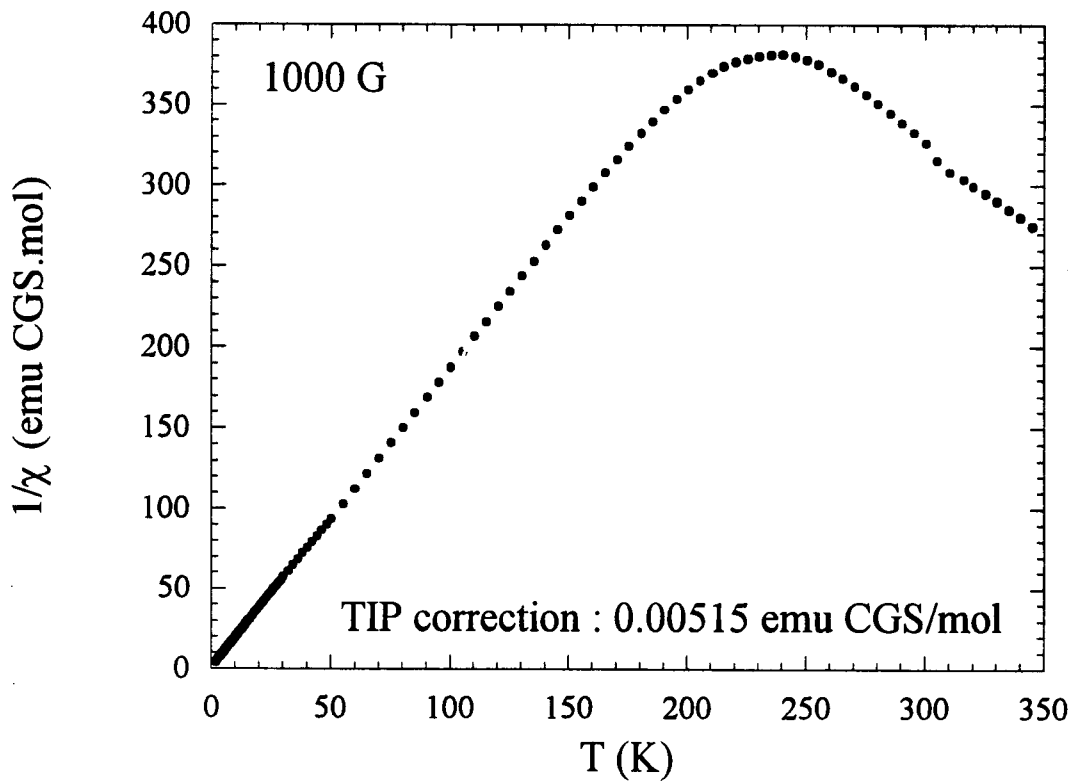

Supplement: b007876j_2.pdf [file b007876j_2.pdf]

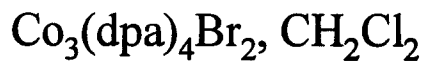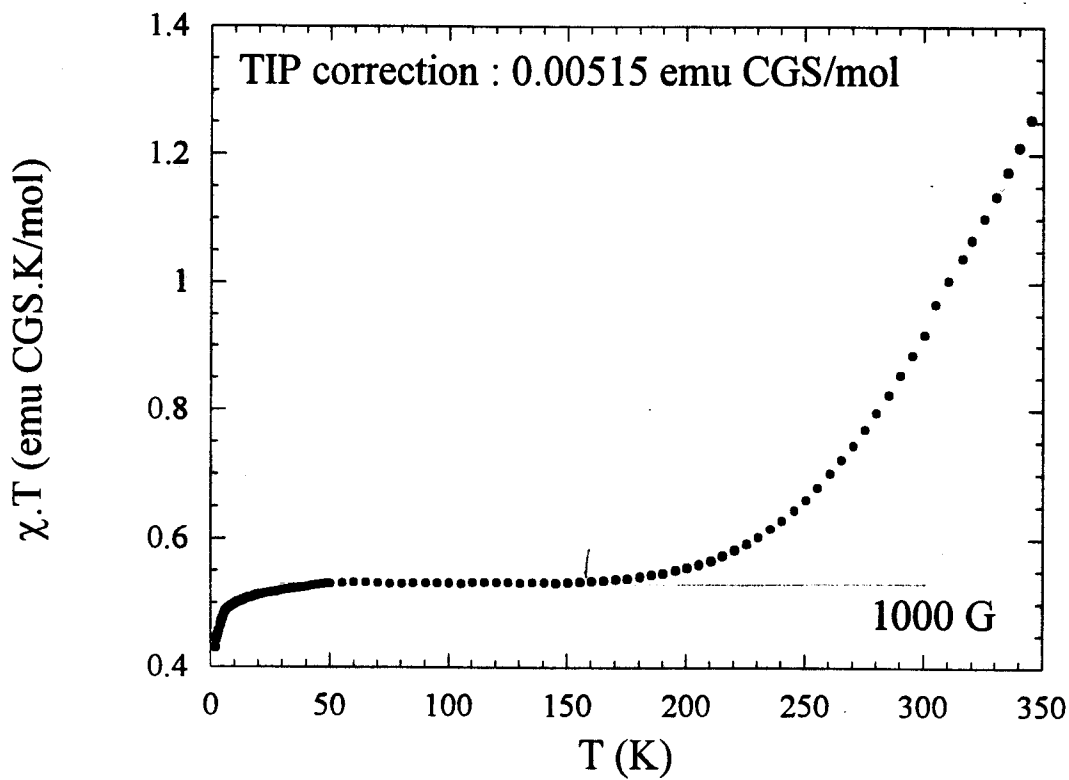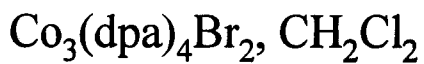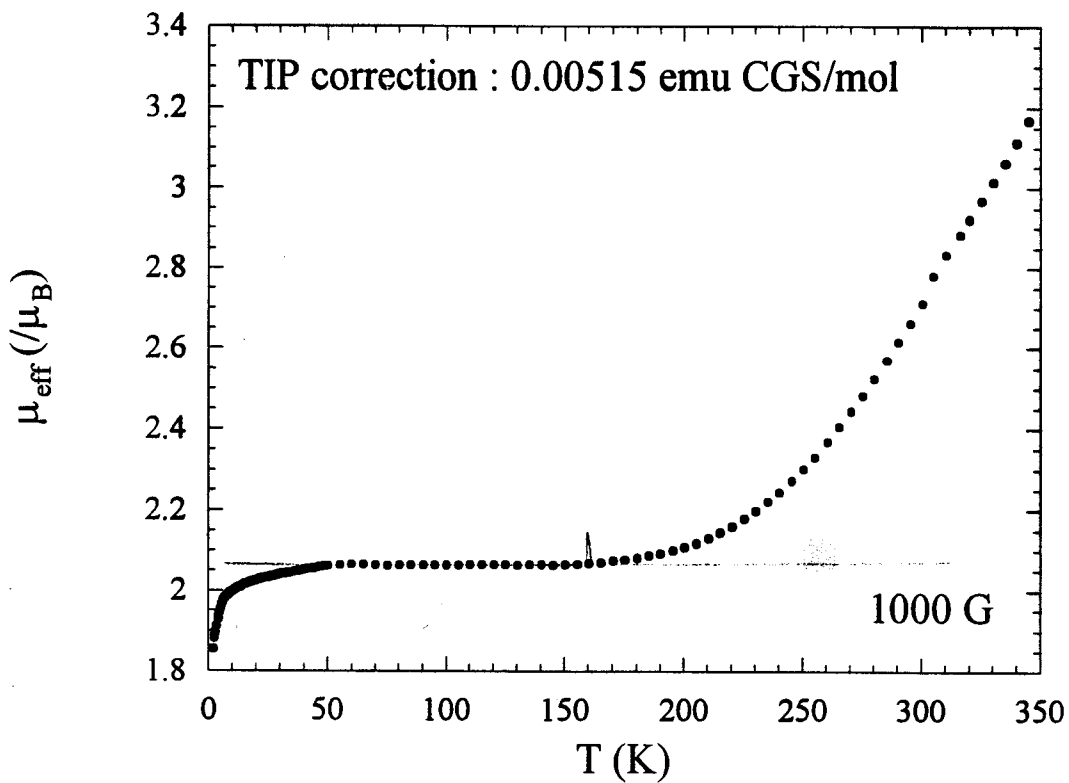

Supplement: b007876j_3.pdf [file b007876j_3.pdf]

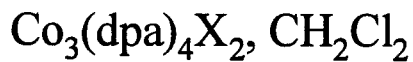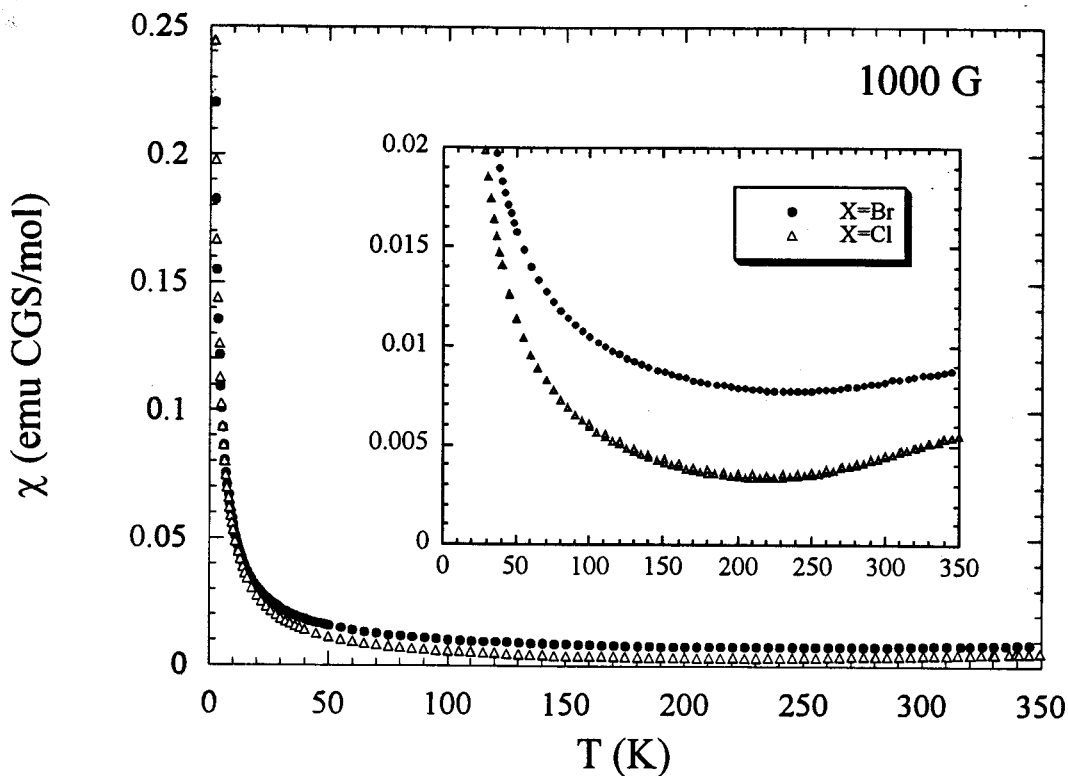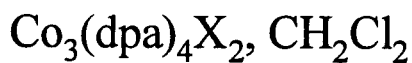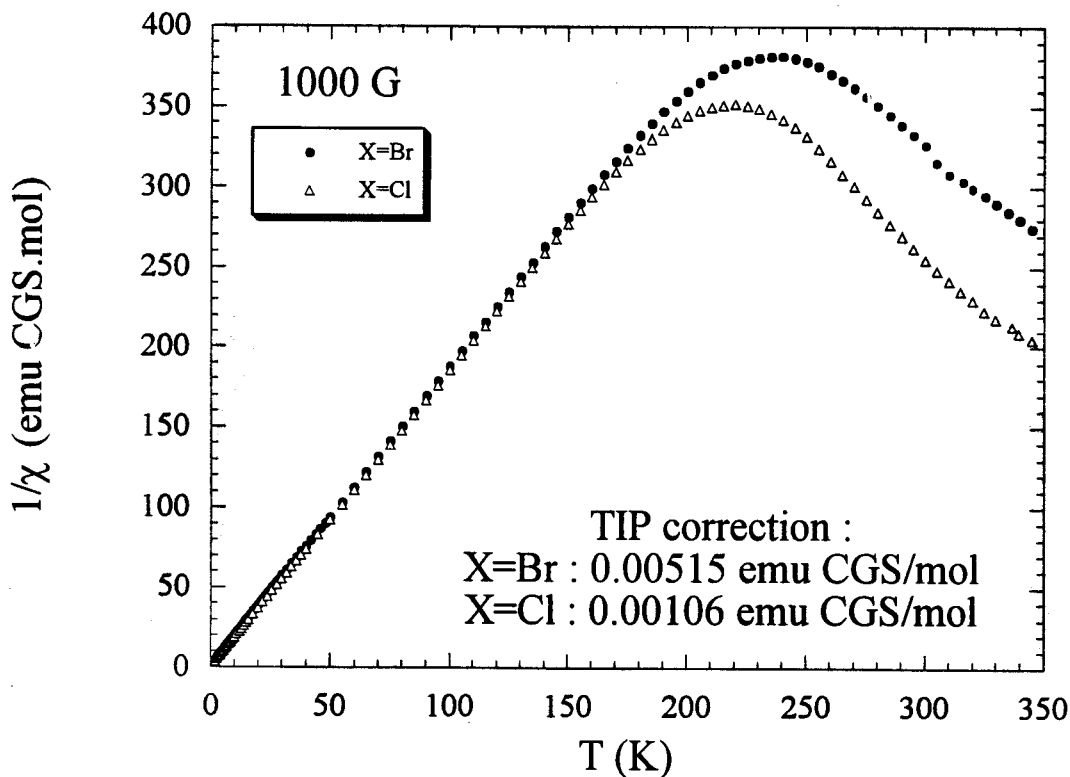

Supplement: b007876j_4.pdf [file b007876j_4.pdf]

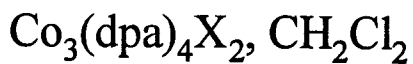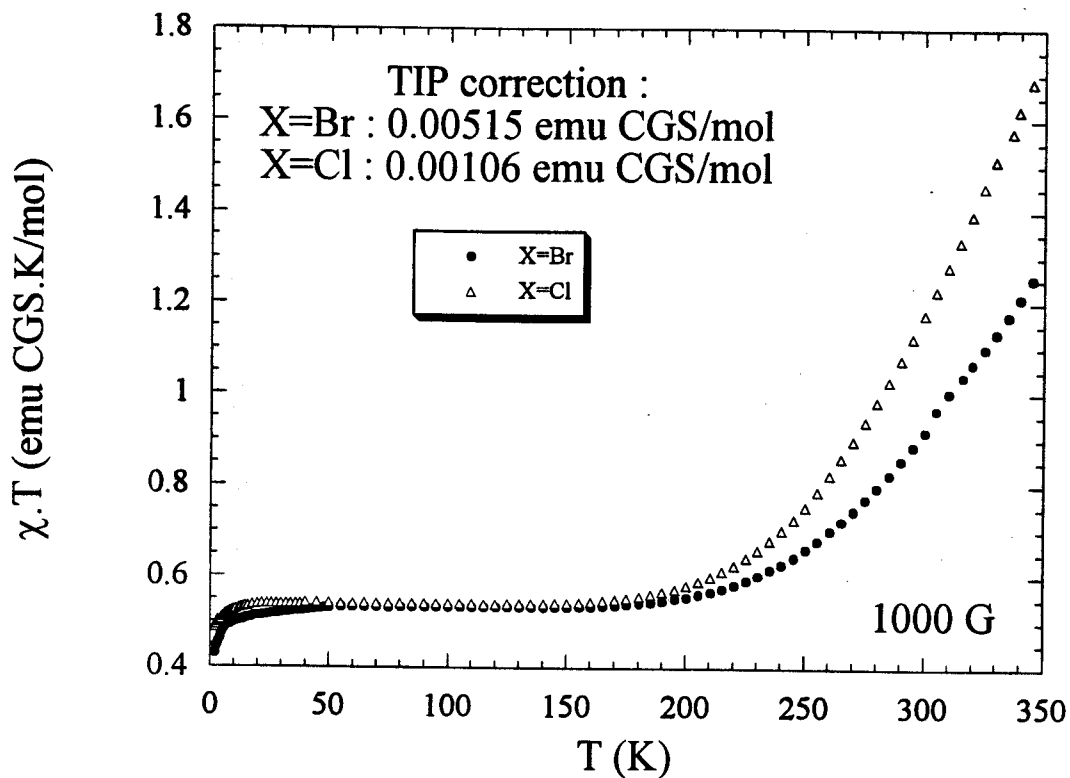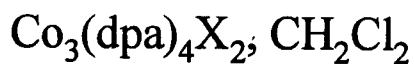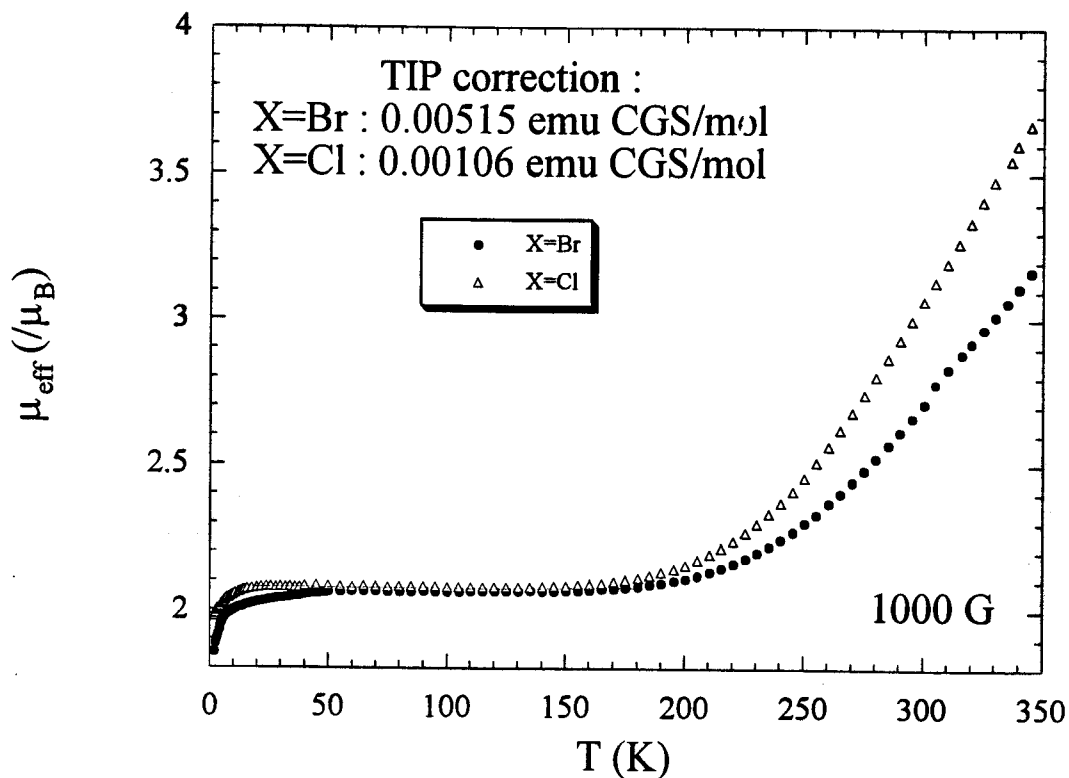

Supplement: b007876j_5.pdf [file b007876j_5.pdf]

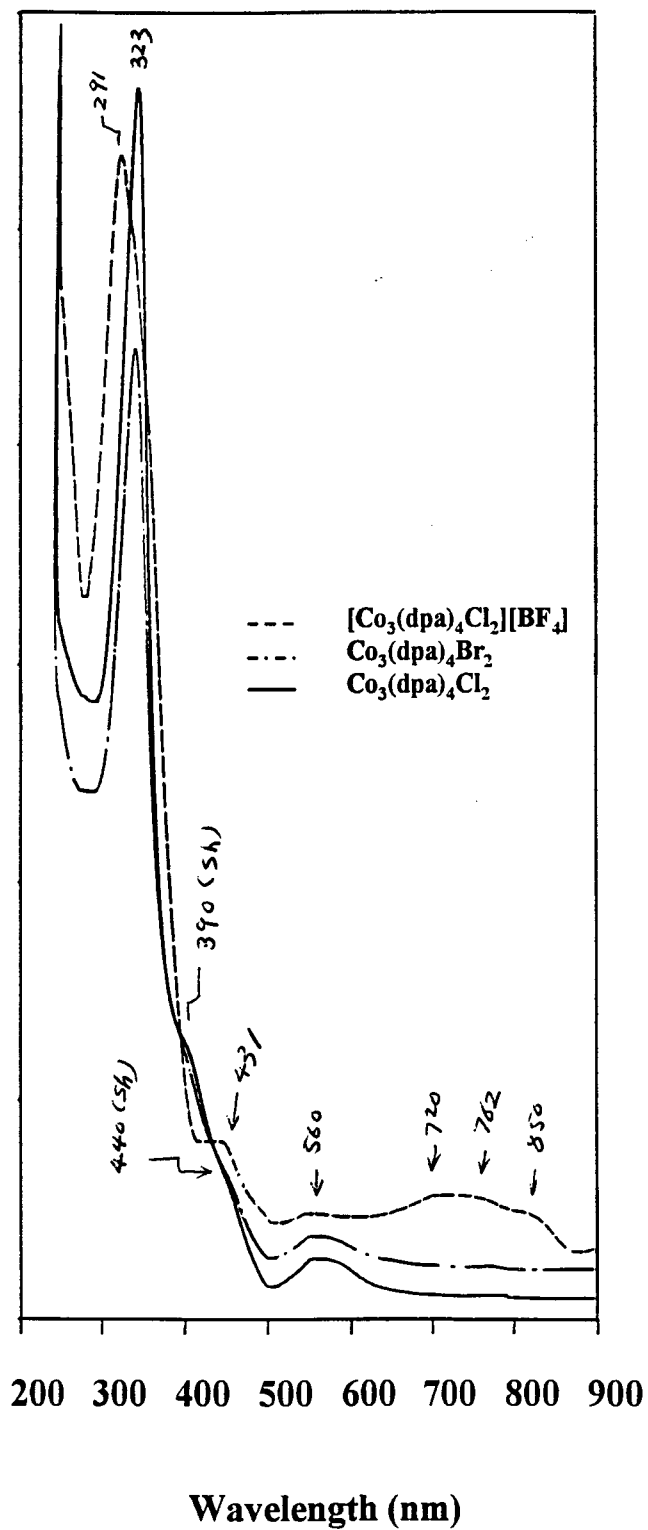

Electronic spectra of  $\text{CH}_2\text{Cl}_2$  solution

Supplement: b007876j_supp.pdf [file b007876j_supp.pdf]
